# Supplementary material
Source: MDPI journal article supplement (https://www.mdpi.com/2311-5637/9/6/517)

# Supplementary material

## Fungal Material

Figure S1. Morphological images of strain SYP-F6997

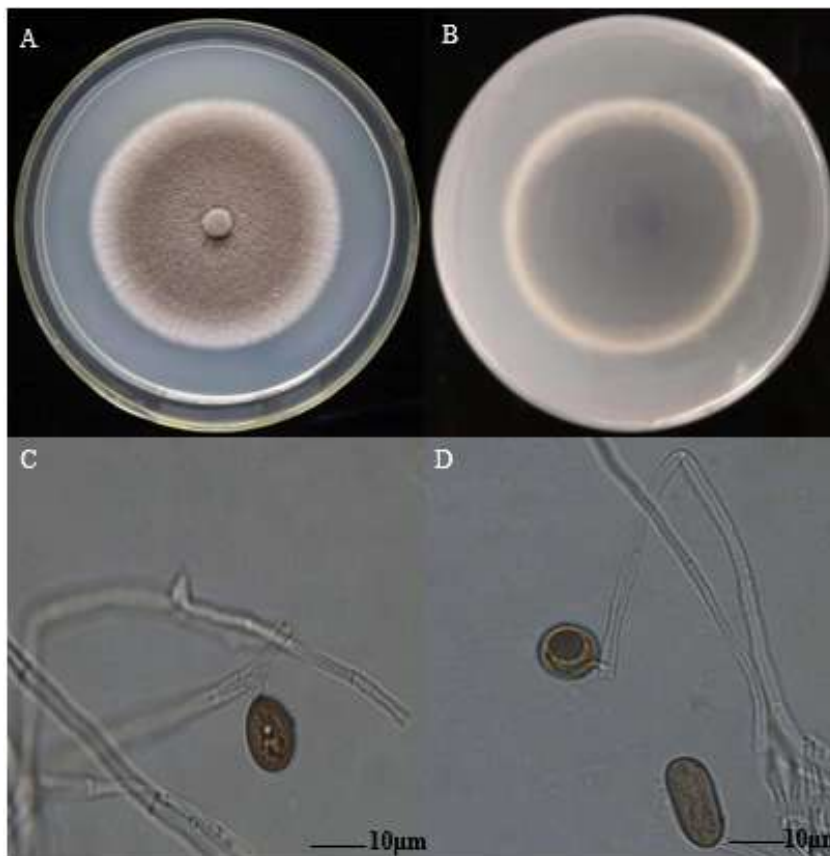

## NMR Data

Figure S2-1. The  $^1\text{H}$  NMR (400 MHz, DMSO- $d_6$ ) spectrum of compound 1.

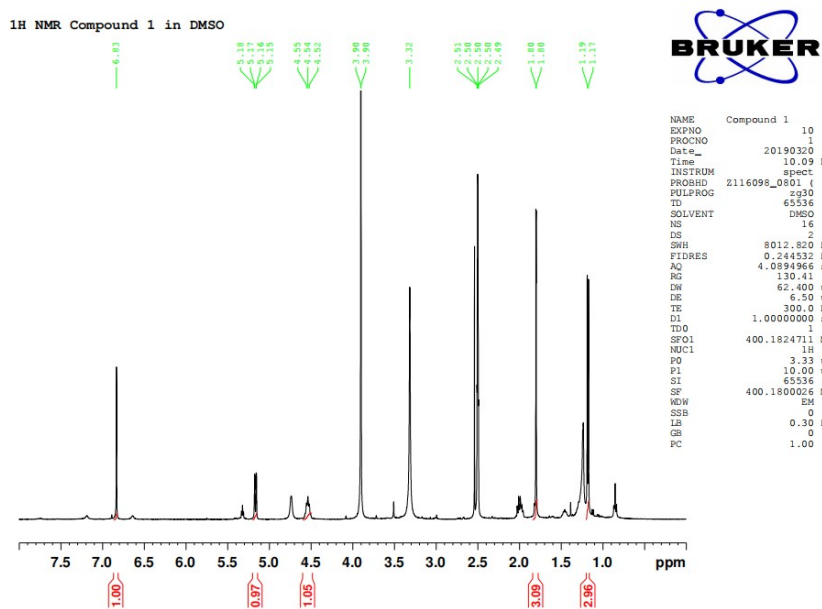

Figure S2-2. The  $^{13}\text{C}$  NMR (100 MHz, DMSO- $d_6$ ) spectrum of compound 1.

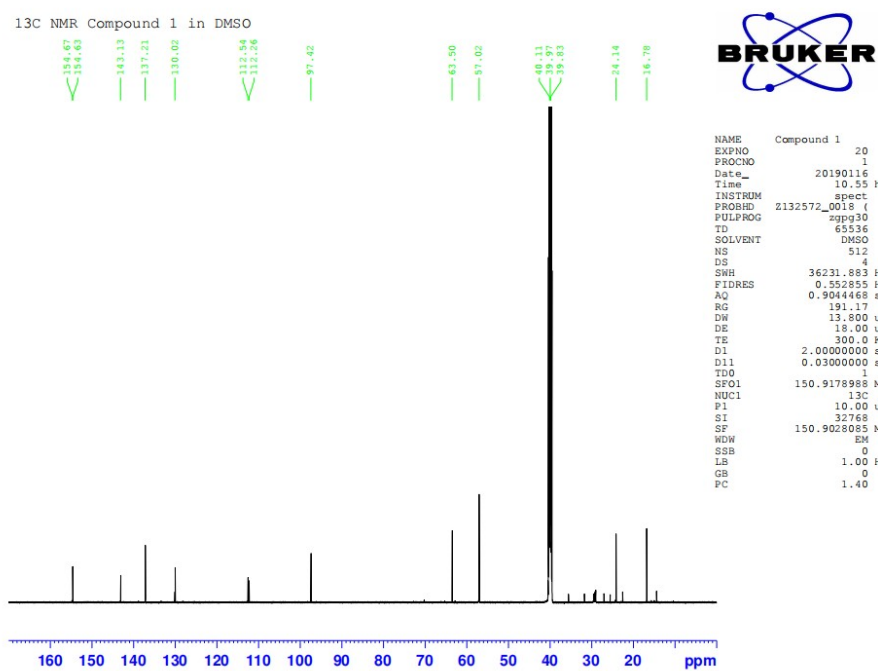

Figure S2-3. DEPT Spectrum of Compound 1.

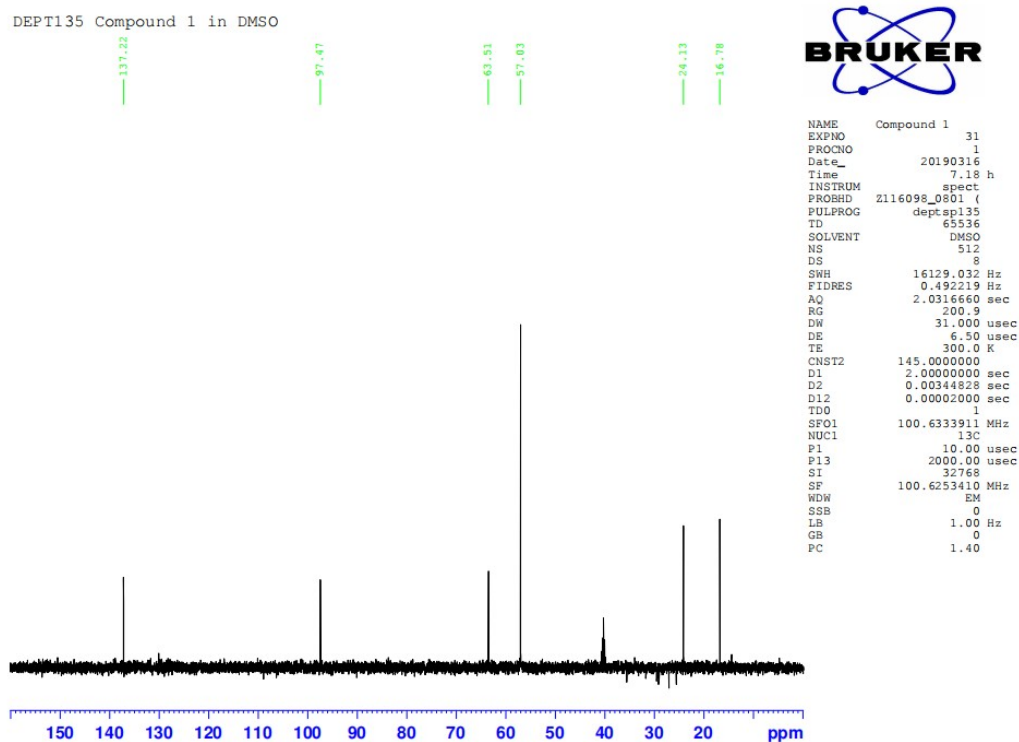

Figure S2-4. H-H COSY Spectrum of Compound 1.

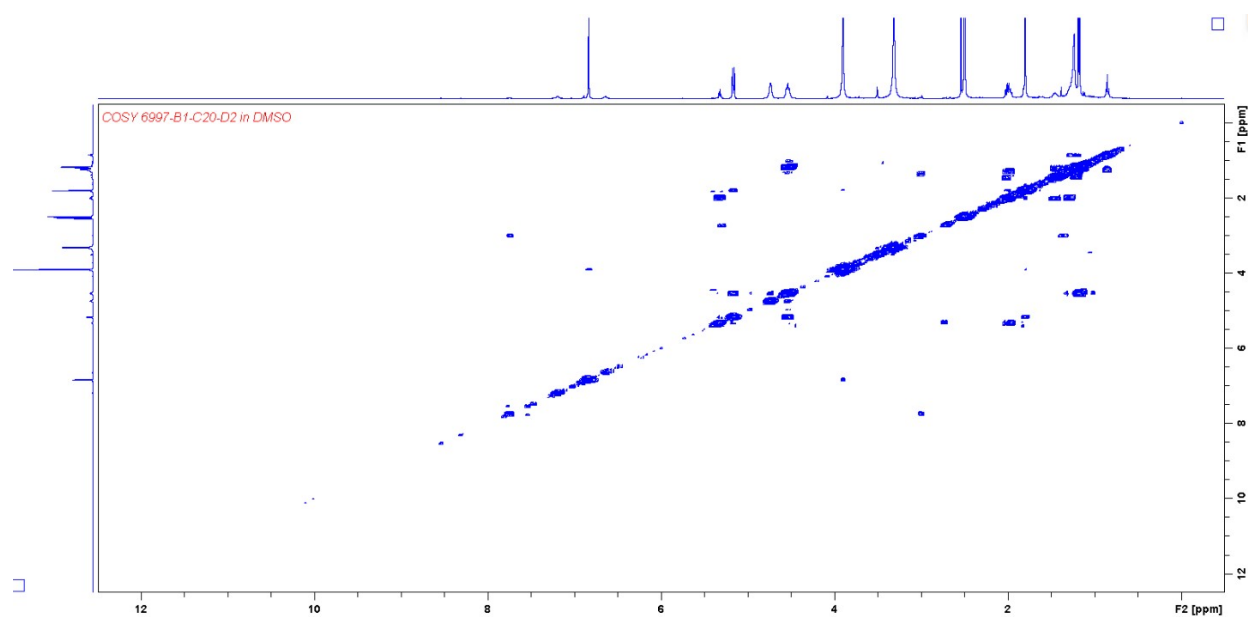

Figure S2-5. HSQC Spectrum of Compound 1.

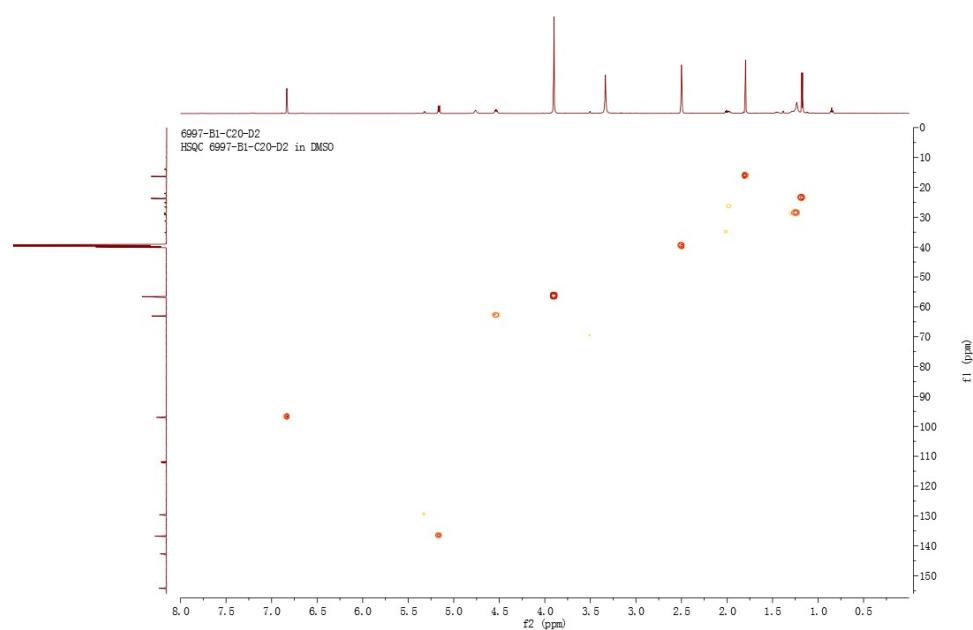

Figure S2-6. HMBC Spectrum of Compound 1.

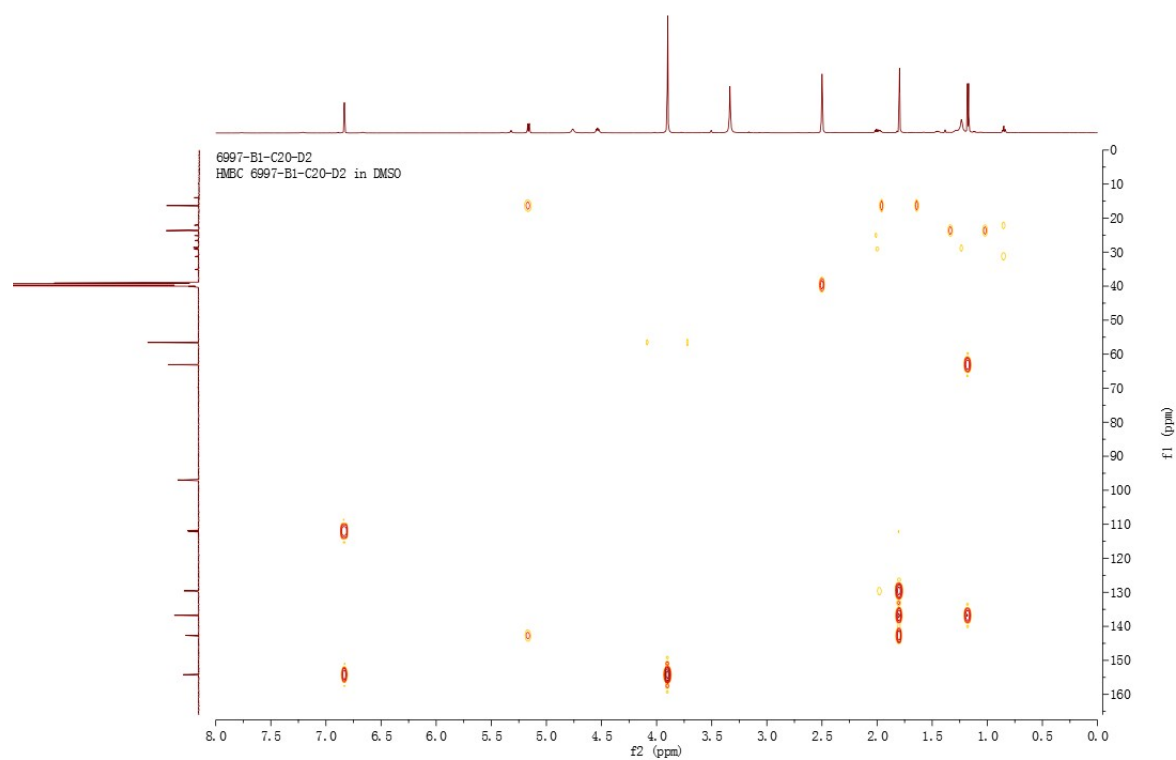

Figure S2-7. NOE Spectrum of Compound 1.

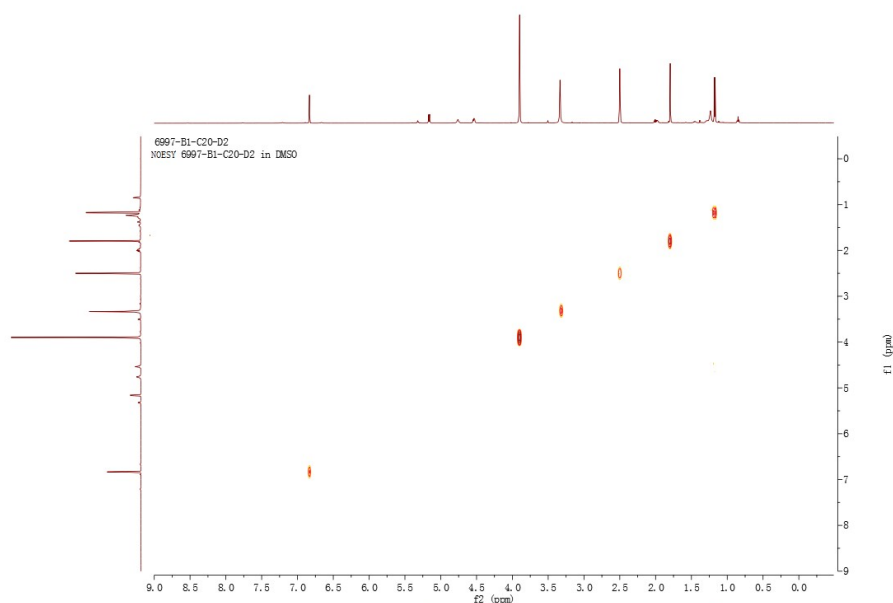

Figure S2-8. IR of Compound 1.

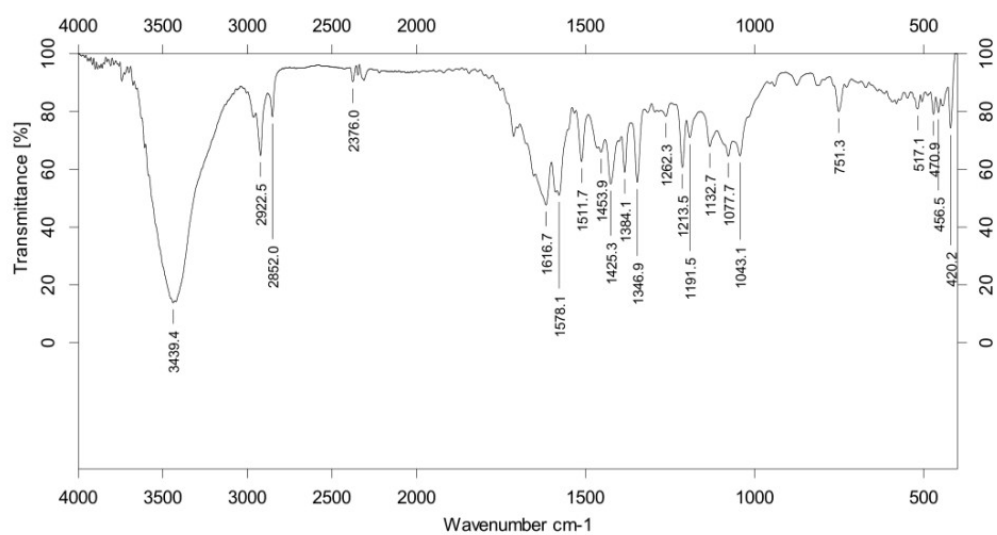

Figure S2-9. UV of Compound 1.

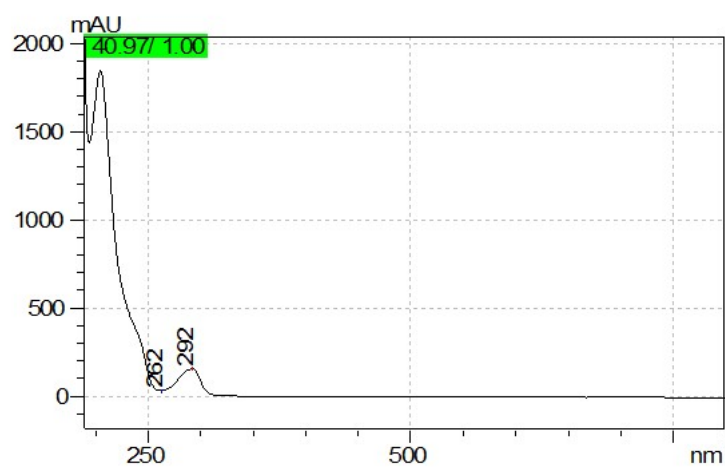

Figure S2-10. (+)-HRESIMS of Compound 1.

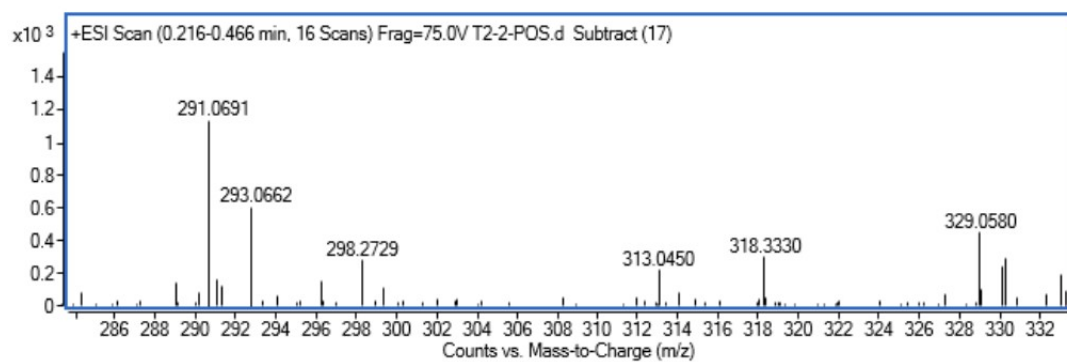

Figure S3-1. The  $^1\text{H}$  NMR (400 MHz, DMSO- $d_6$ ) spectrum of compound 2.

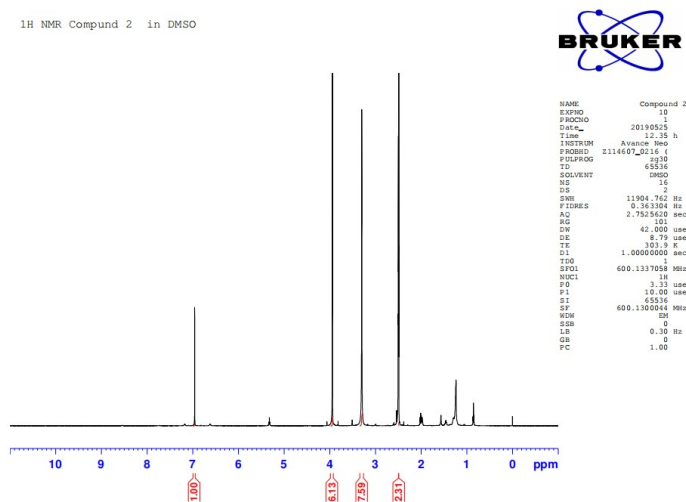

Figure S3-2. The  $^{13}\text{C}$  NMR (100 MHz, DMSO- $d_6$ ) spectrum of compound 2.

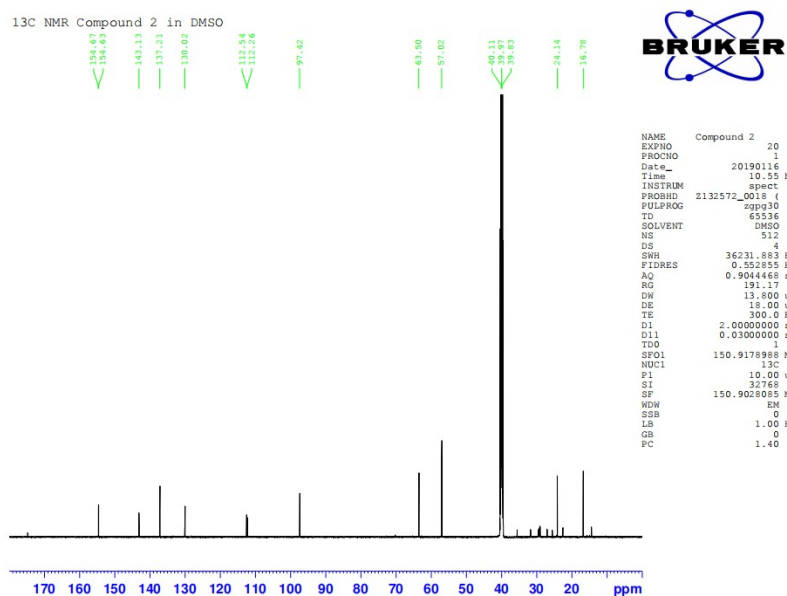

Figure S3-3. HSQC Spectrum of Compound 2.

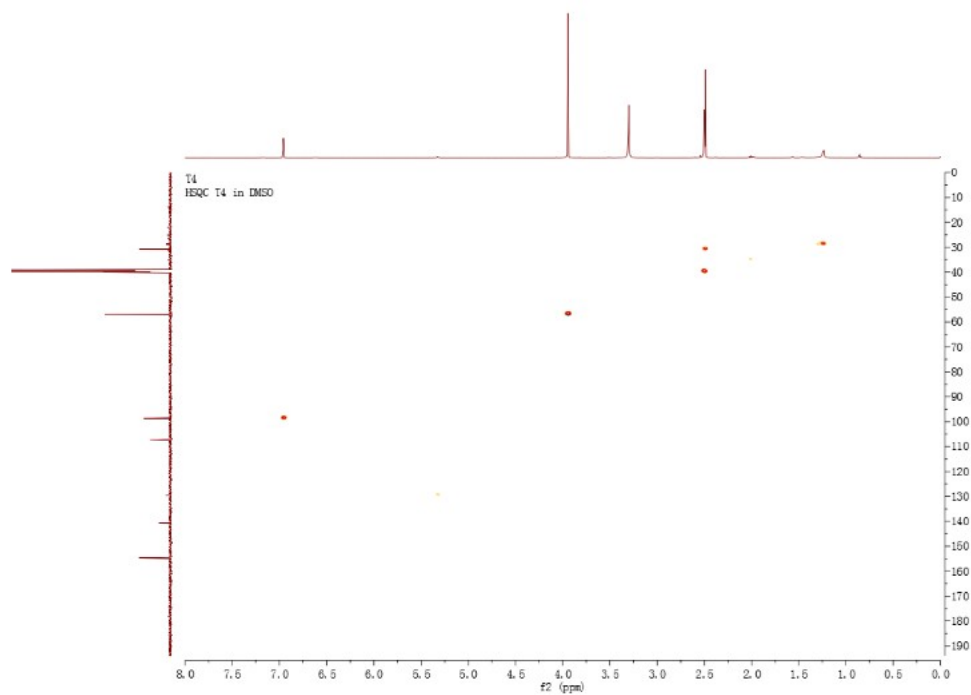

Figure S3-4. HMBC Spectrum of Compound 2.

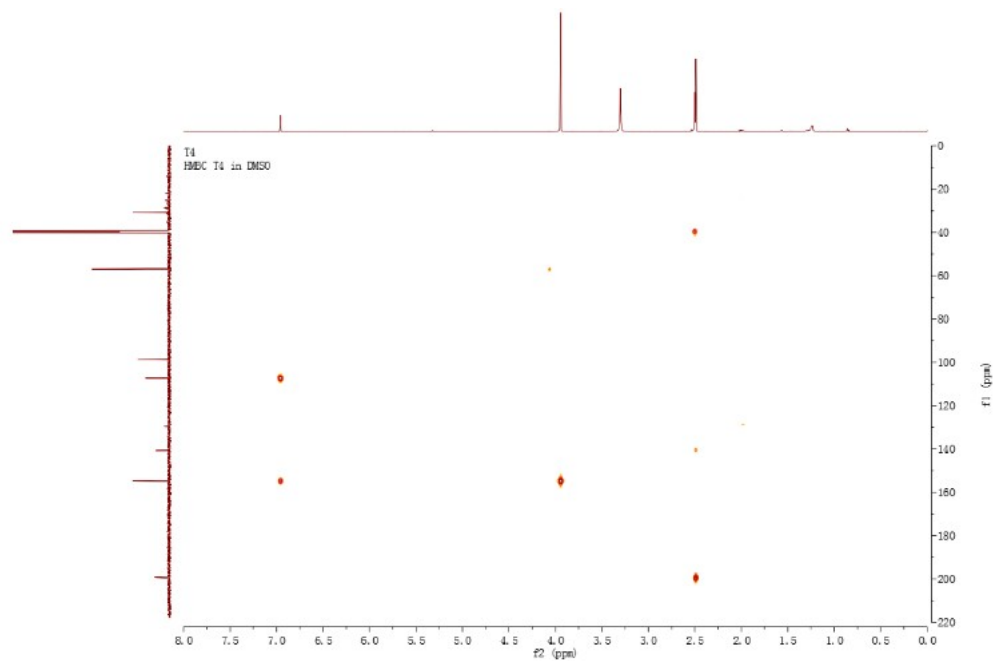

Figure S3-5. NOESY Spectrum of Compound 2.

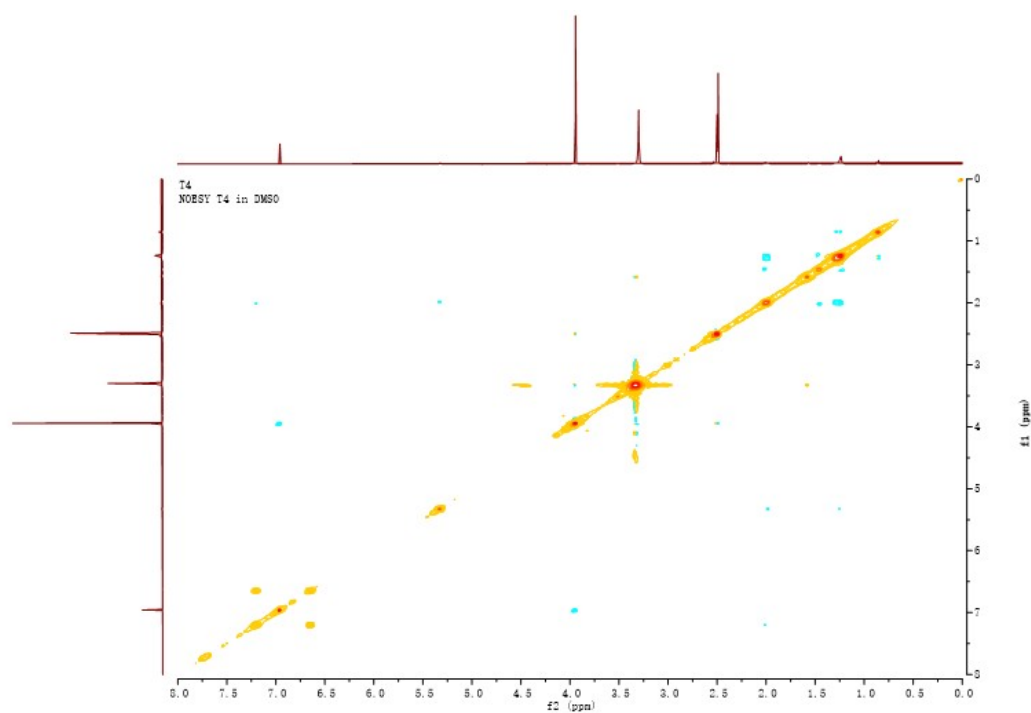

Figure S3-6. (+)-HRESIMS of Compound 2.

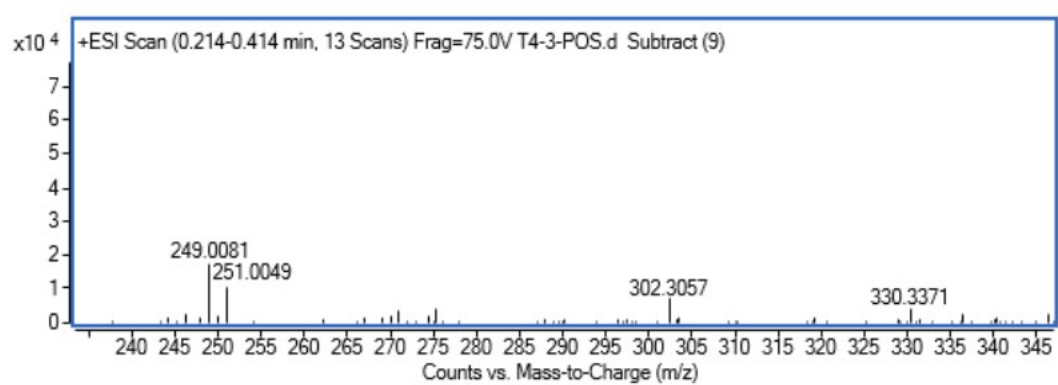

Figure S3-7. IR spectrum of compound 2.

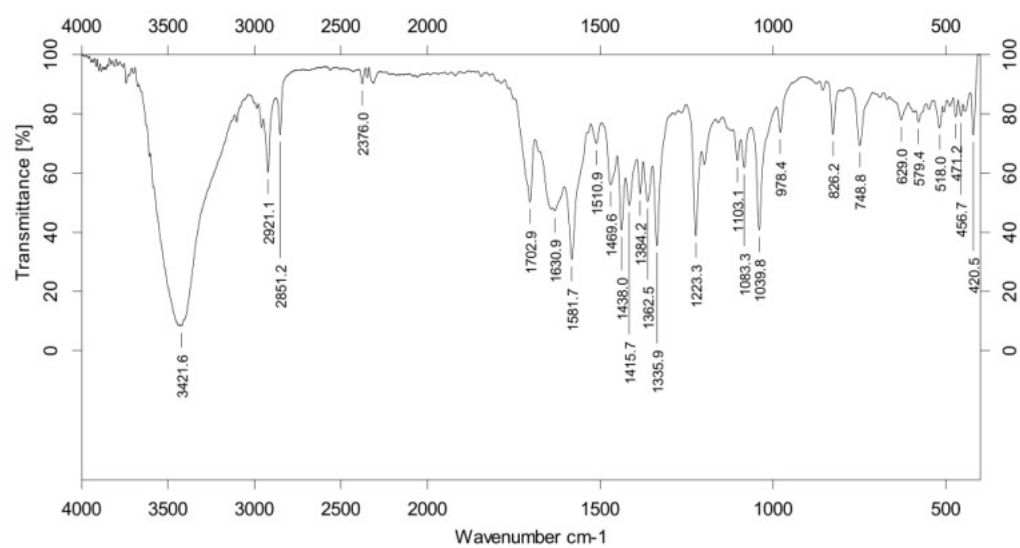

Figure S3-8. UV spectrum of compound 2.

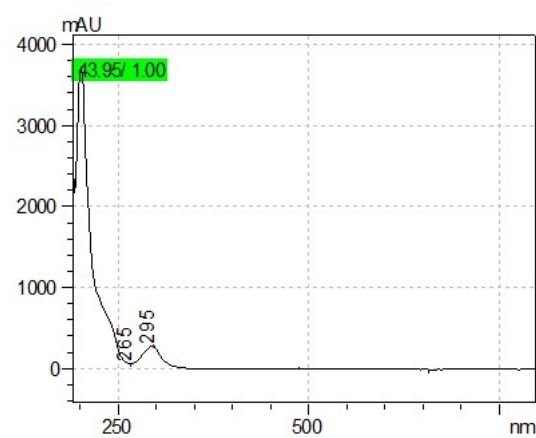

Figure S4-1. The  $^1\text{H}$  NMR (400 MHz, DMSO- $d_6$ ) spectrum of compound 3.

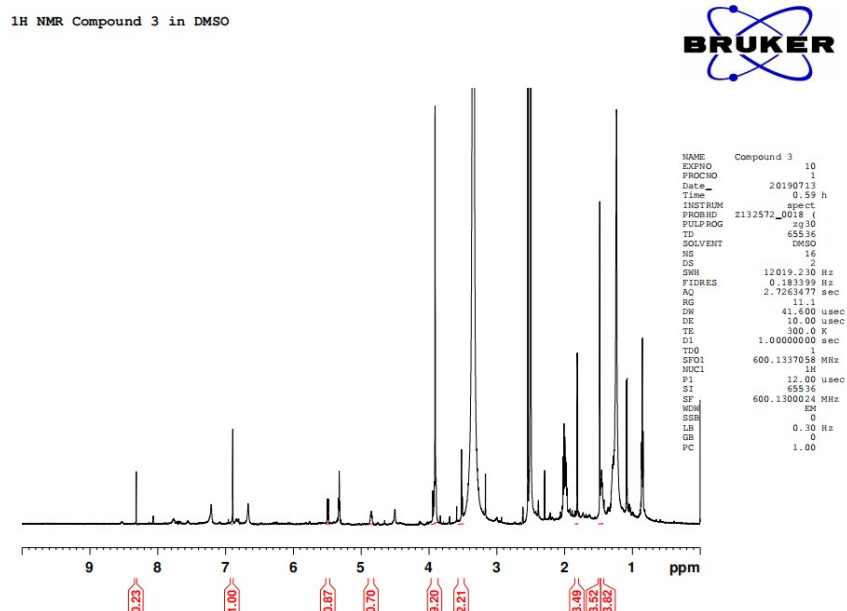

Figure S4-2. The  $^{13}\text{C}$  NMR (100 MHz, DMSO- $d_6$ ) spectrum of compound 3.

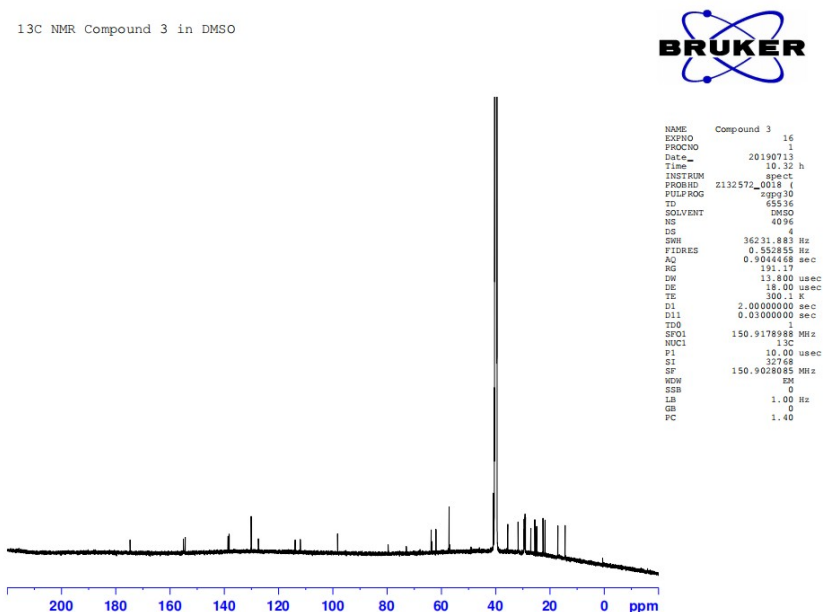

Figure S4-3. HSQC Spectrum of Compound 3.

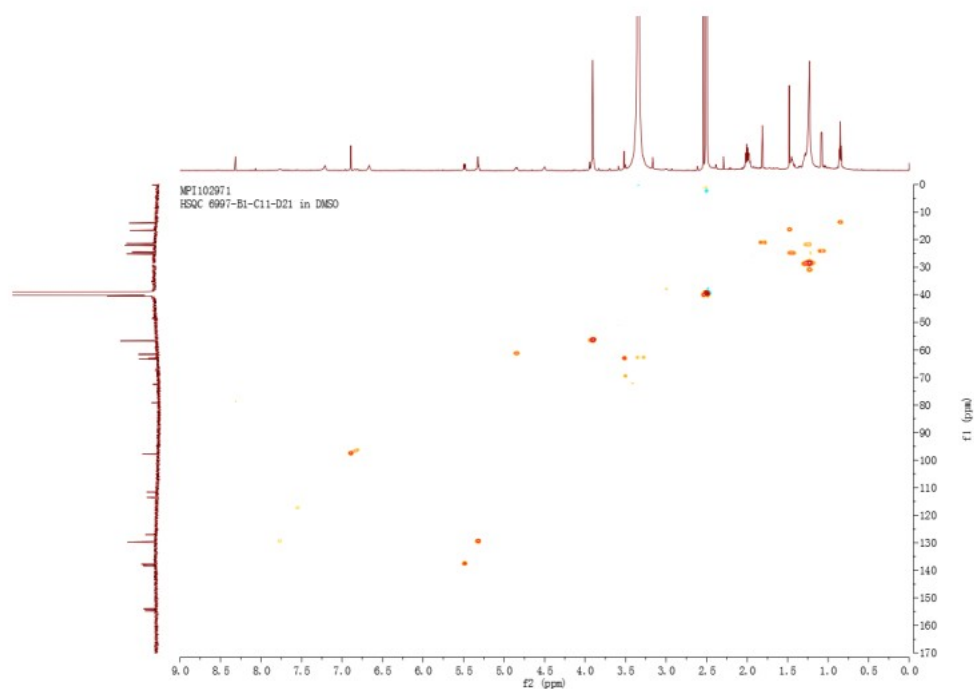

Figure S4-4. HMBC Spectrum of Compound 3.

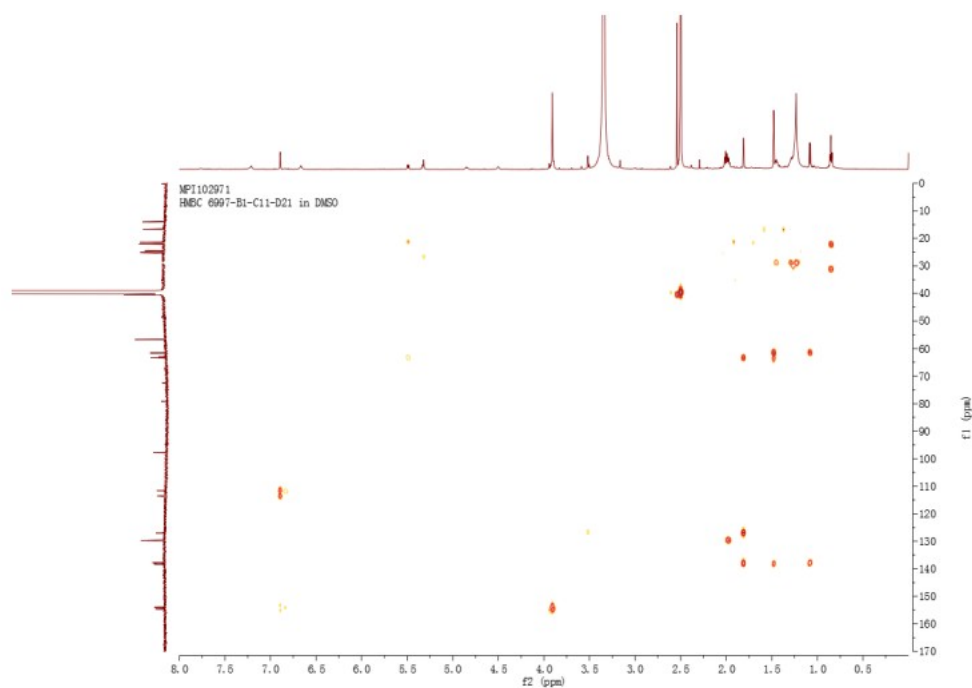

Figure S4-5. NOESY Spectrum of Compound 3.

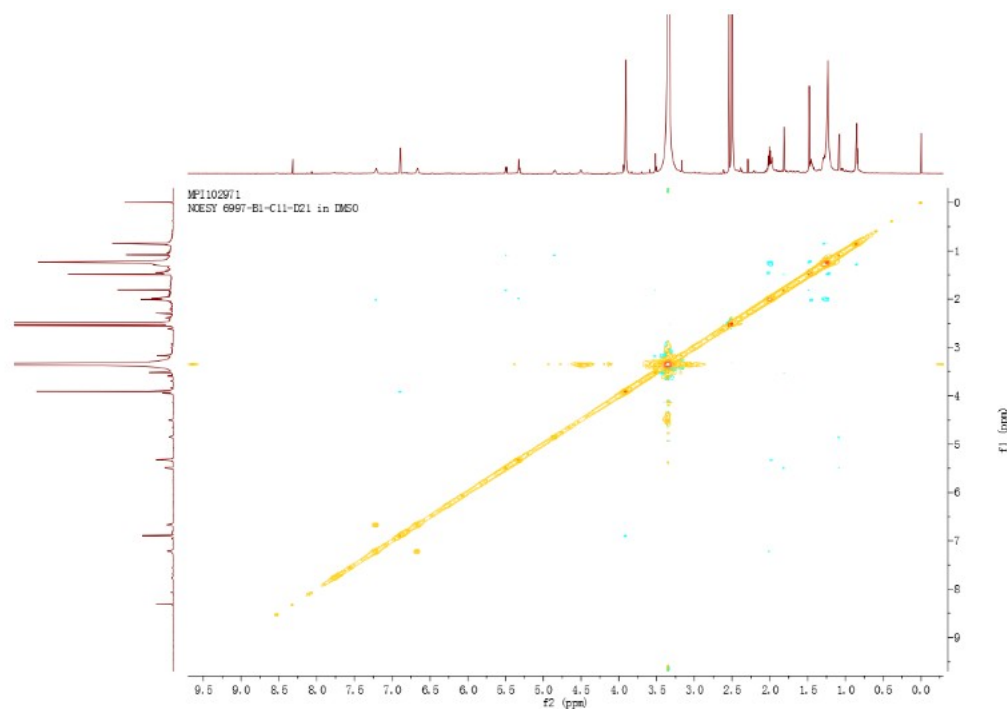

Figure S4-6. (+)-HRESIMS of Compound 3.

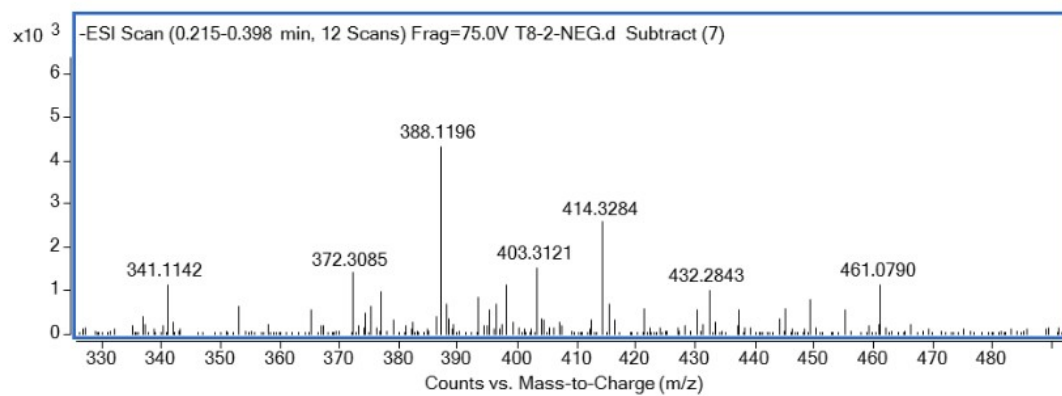

Figure S4-7. IR spectrum of compound 3.

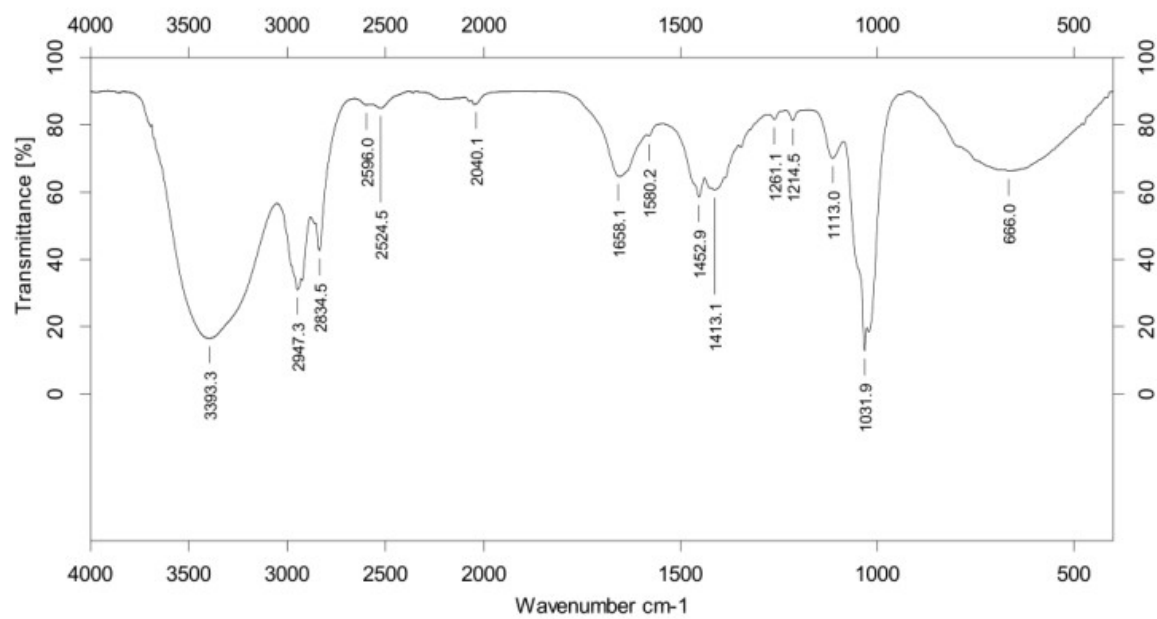

Figure S4-8. UV spectrum of compound 3.

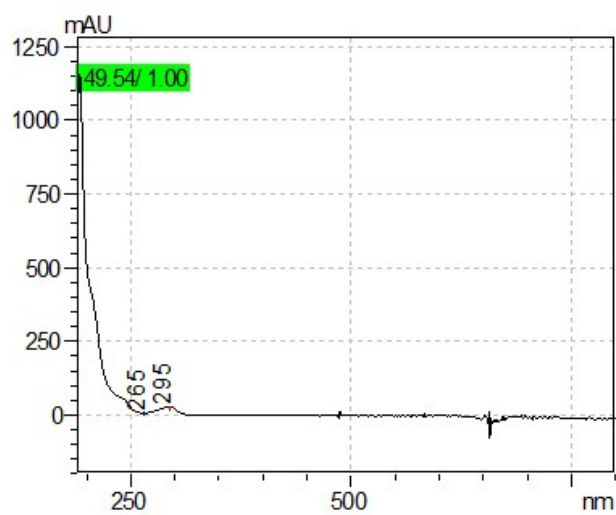

Figure S5-1. The  $^1\text{H}$  NMR (400 MHz,  $\text{DMSO-d}_6$ ) spectrum of compound 4.

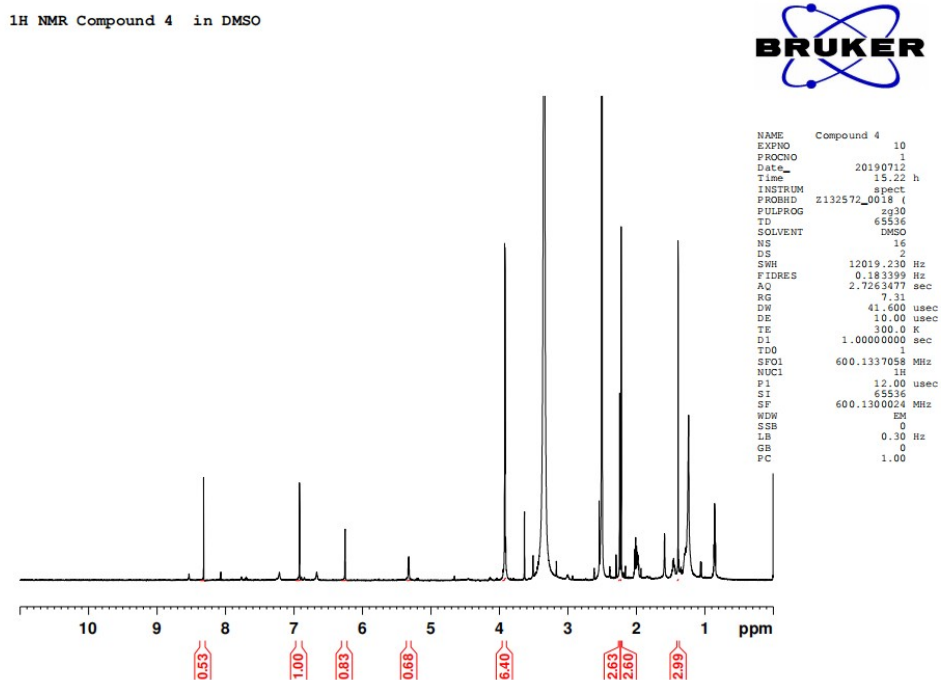

Figure S5-2. The  $^{13}\text{C}$  NMR (100 MHz,  $\text{DMSO-d}_6$ ) spectrum of compound 4.

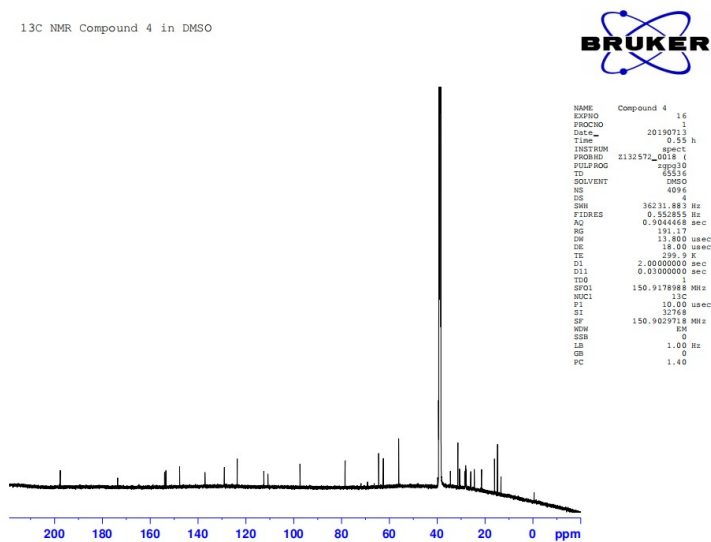

Figure S5-3. The DEPT135° spectrum of 4

DEPT135 Compound 4 in DMSO

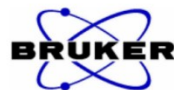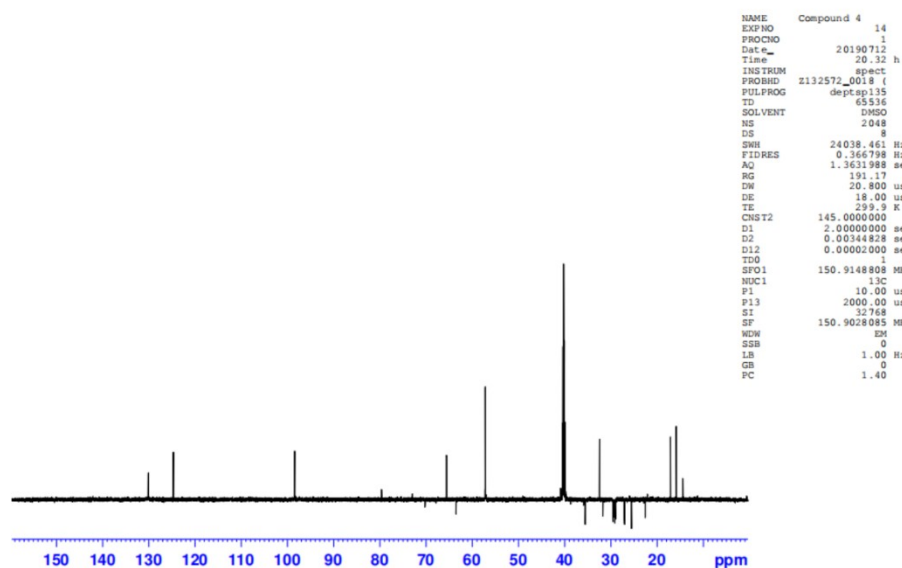

Figure S5-4. HSQC Spectrum of Compound 4.

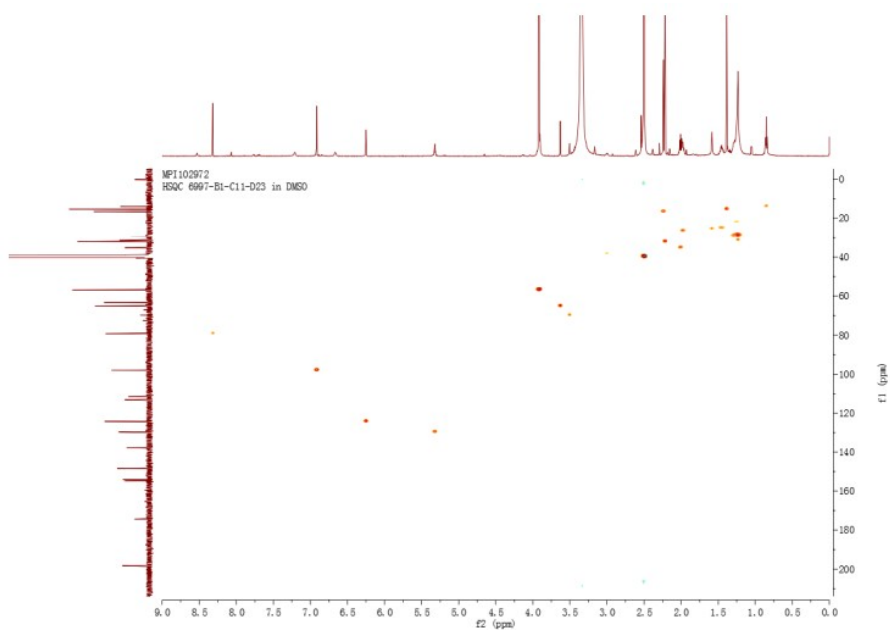

Figure S5-5. HMBC Spectrum of Compound 4.

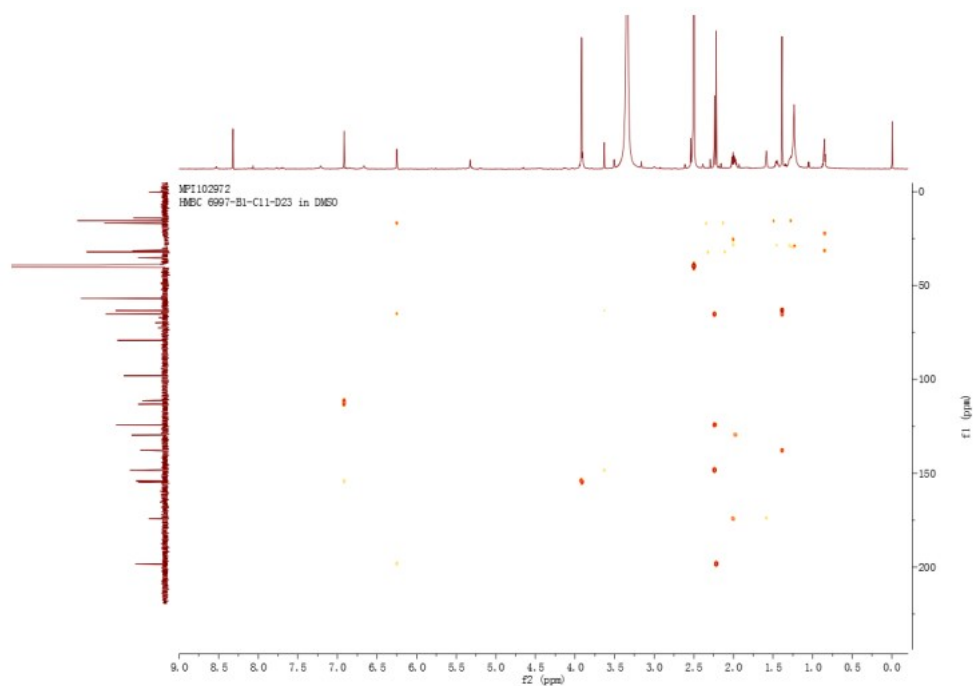

Figure S5-6. NOESY Spectrum of Compound 4.

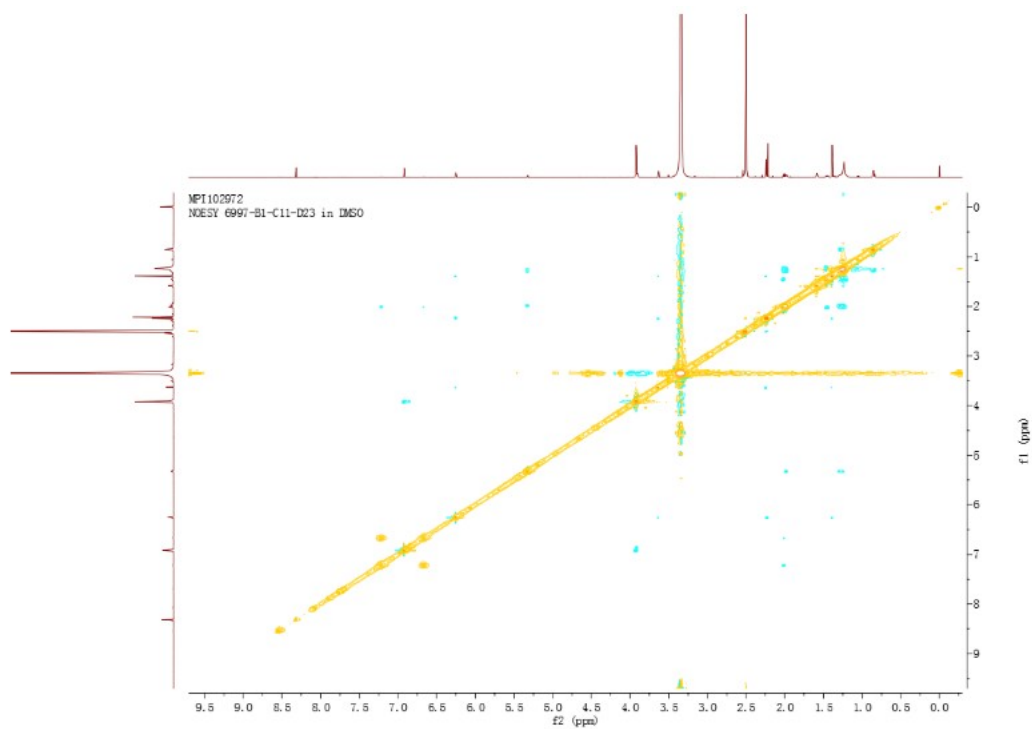

Figure S5-7. (+)-HRESIMS of Compound 4.

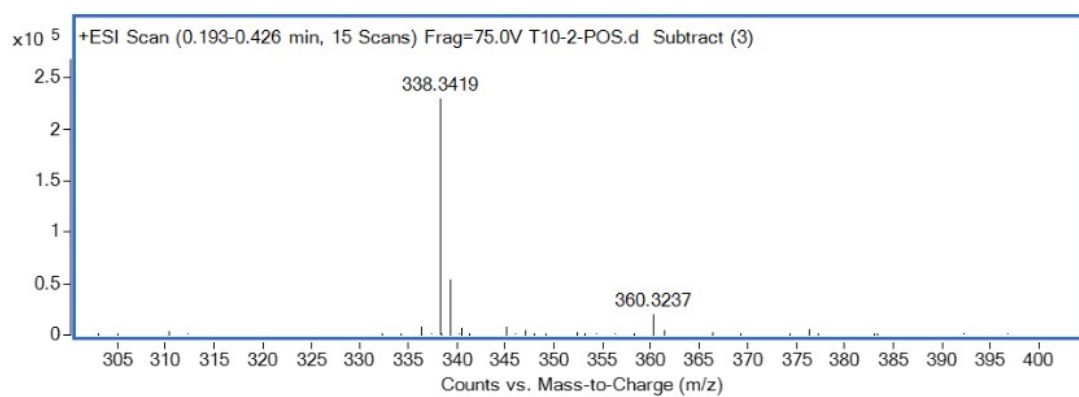

Figure S5-8. IR spectrum of compound 4.

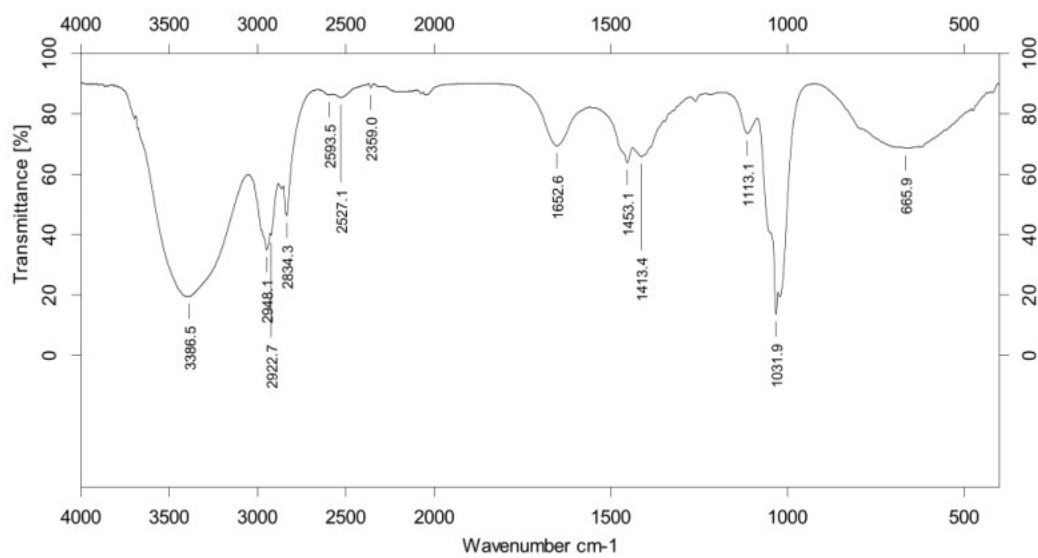

Figure S5-9. UV spectrum of compound 4.

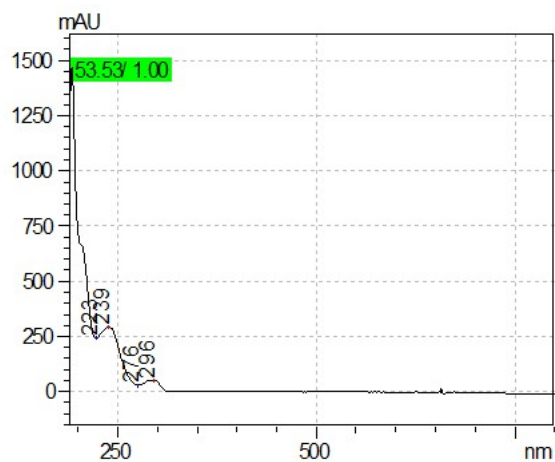

Figure S6-1. The  $^1\text{H}$  NMR (400 MHz,  $\text{DMSO-d}_6$ ) spectrum of compound 5.

$^1\text{H}$  NMR Compound 5 in DMSO

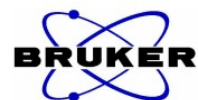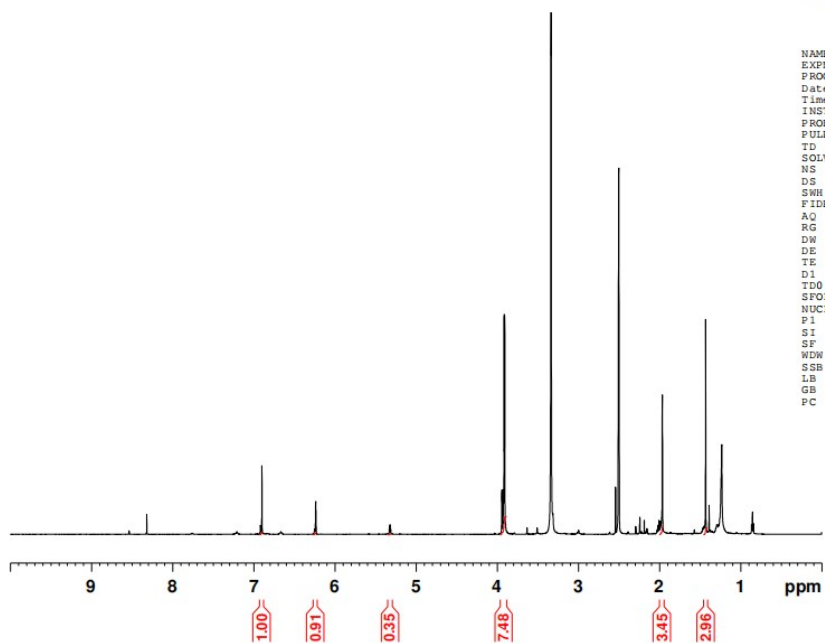

```

NAME      Compound 5
EXPNO     10
PROCNO    1
Date_     20191116
Time      18.13 h
INSTRUM    spect
PROBHD     2132572_0018 (
PULPROG    zg30
TD          65536
SOLVENT    DMSO
NS          16
DS          2
SWH         12019.230 Hz
FIDRES     0.183399 Hz
AQ          2.7263477 sec
RG          11.1
DW          41.600 usec
DE          10.00 usec
TE          300.0 K
D1          1.00000000 sec
TDO         1
SFO1       600.1337058 MHz
NUC1        1H
P1          12.00 usec
SI          65536
SF          600.1300033 MHz
WDW         EM
SSB         0
LB          0.30 Hz
GB          0
PC          1.00
    
```

Figure S6-2. The  $^{13}\text{C}$  NMR (100 MHz, DMSO- $d_6$ ) spectrum of compound 5.

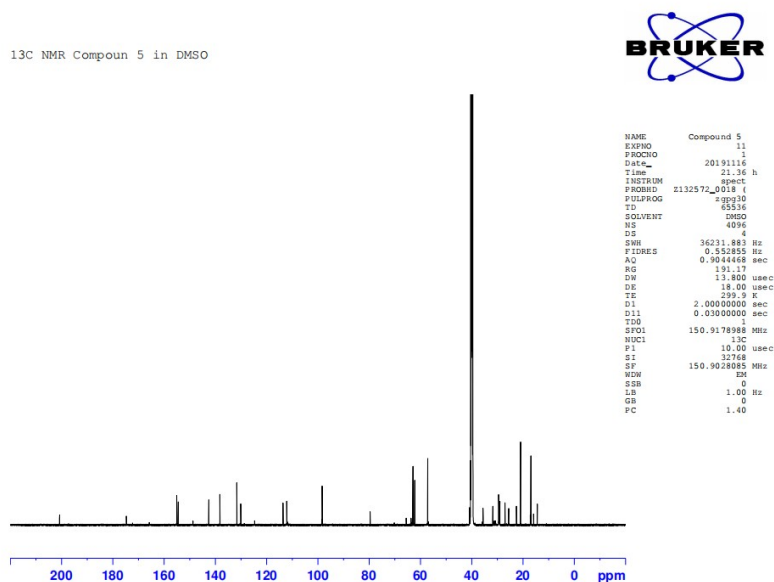

Figure S6-3. DEPT Spectrum of Compound 5.

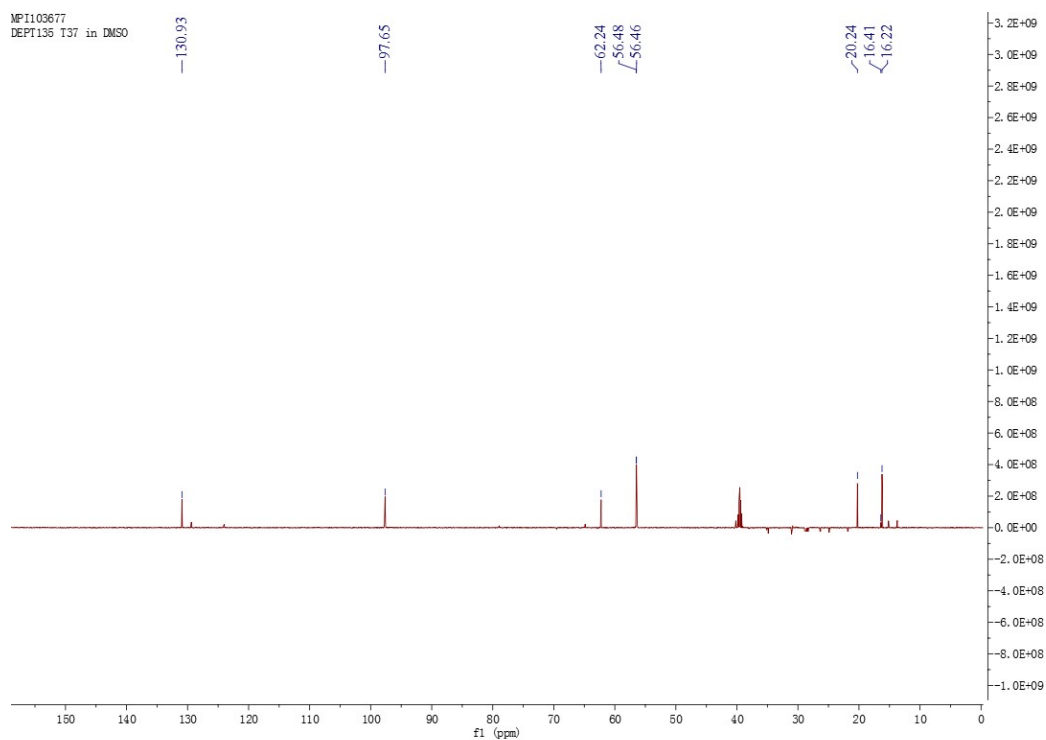

Figure S6-4. HSQC Spectrum of Compound 5.

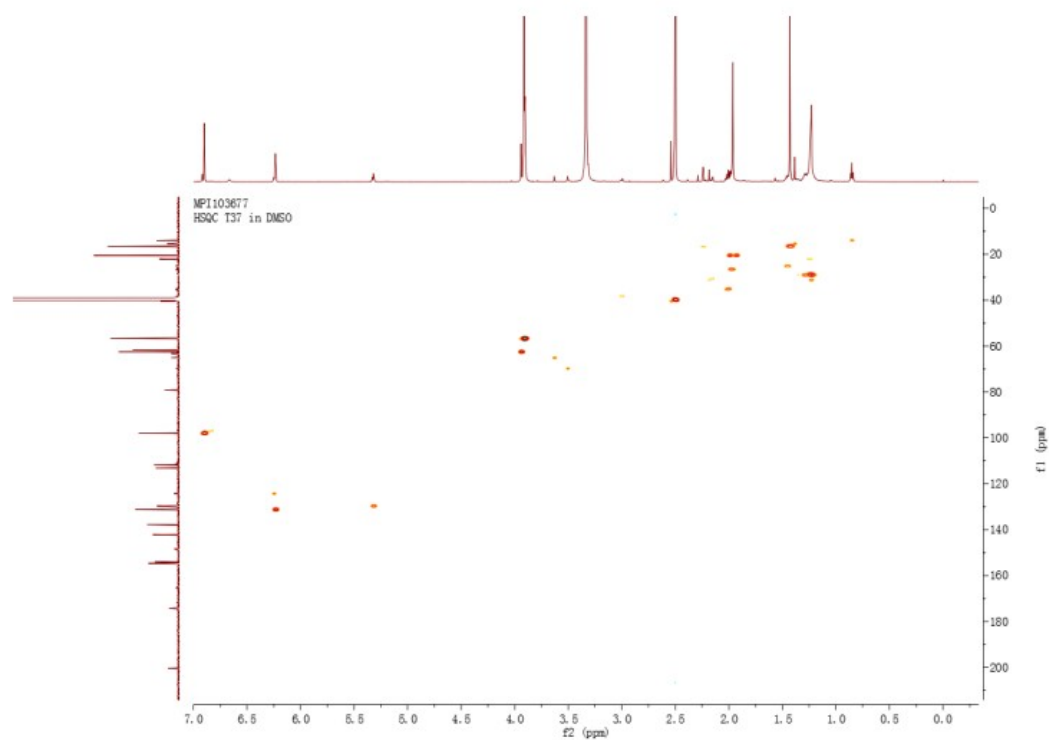

Figure S6-5. HMBC Spectrum of Compound 5.

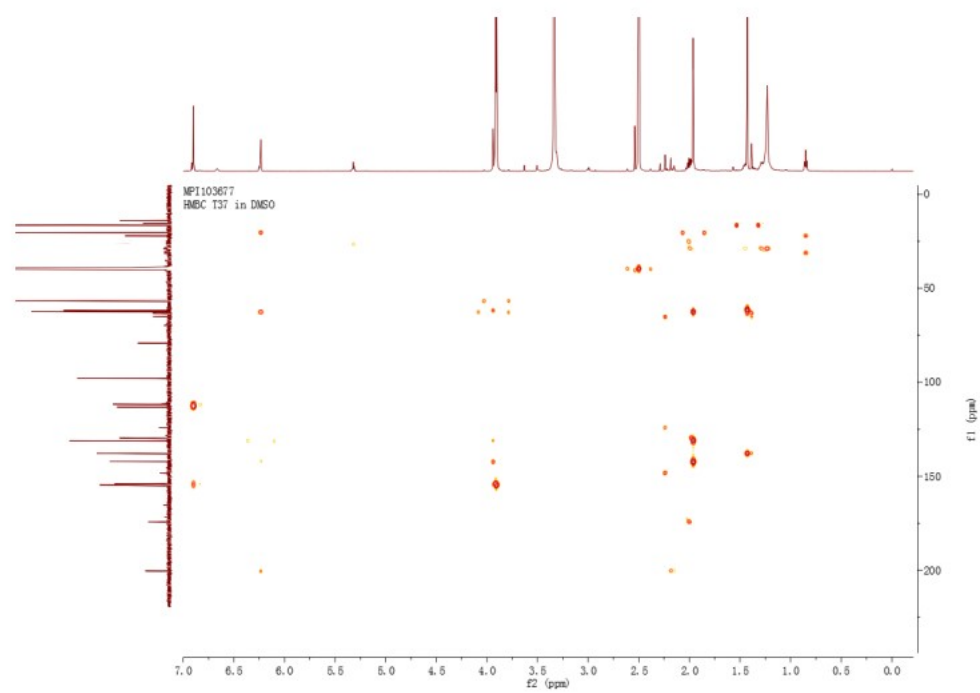

Figure S6-6. NOESY Spectrum of Compound 5.

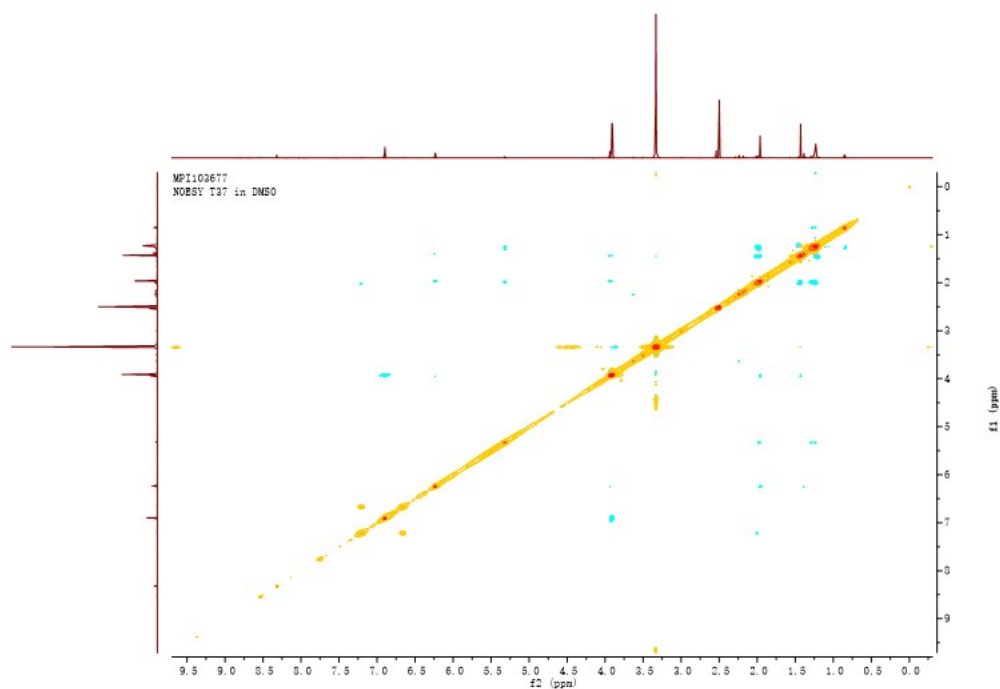

Figure S6-7. (+)-HRESIMS of Compound 5.

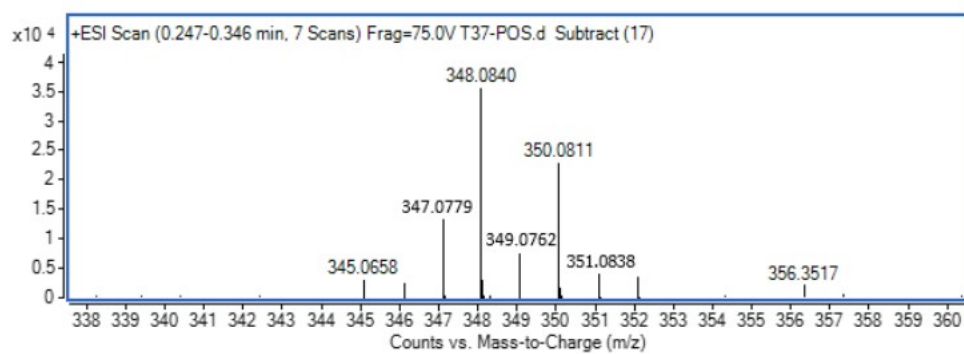

Figure S6-8. IR spectrum of compound 5.

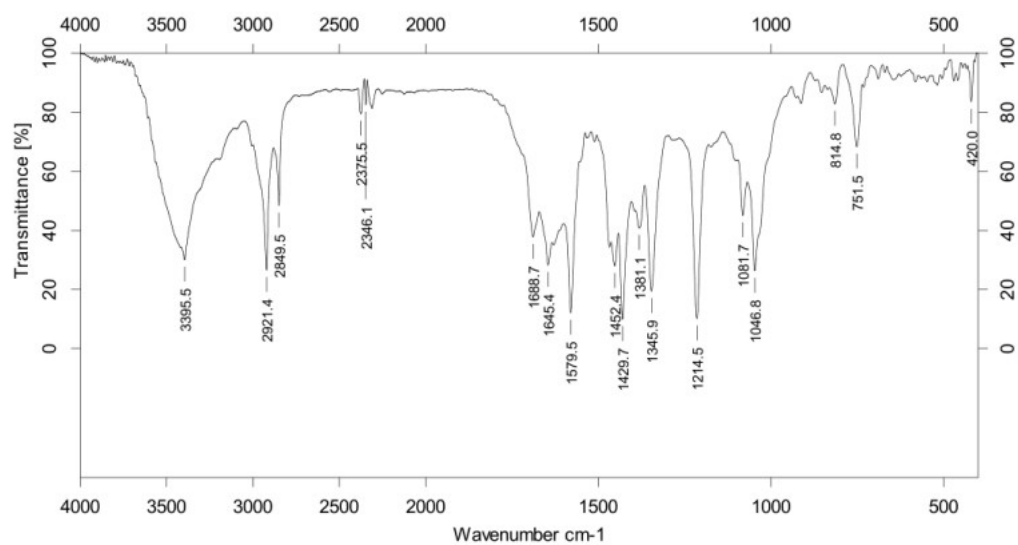

Figure S6-9. UV spectrum of compound 5.

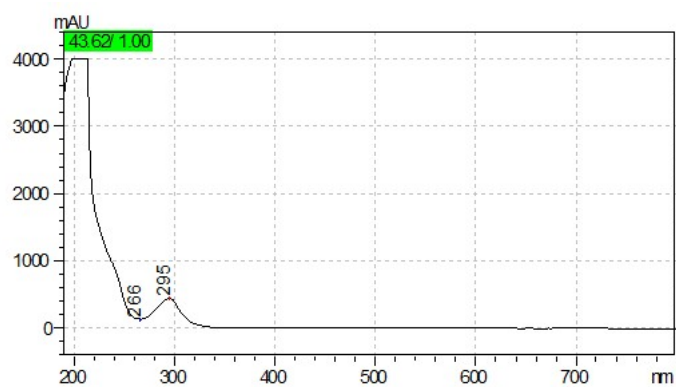

Figure S 7-1 (+)-HRESIMS of Compound 6.

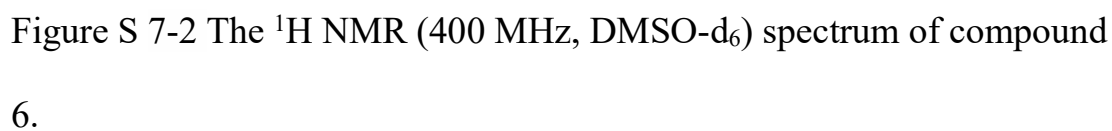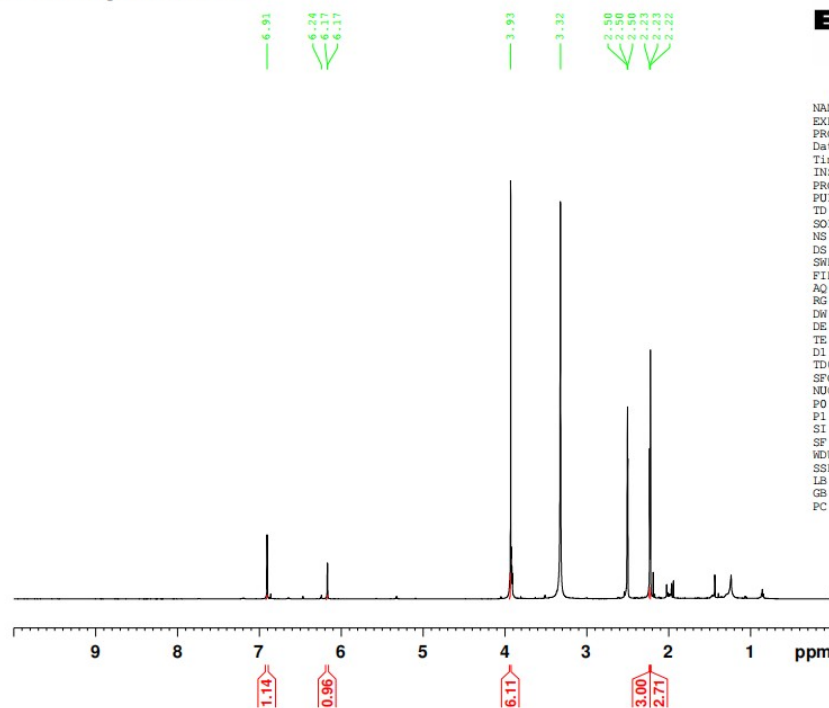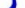

|         |             |            |
|---------|-------------|------------|
| NAME    | Compound 6  |            |
| EXPNO   |             | 10         |
| PROCNO  |             | 1          |
| Date_   | 20190628    |            |
| Time    | 14.44       | h          |
| INSTRUM | Avance Neo  |            |
| PROBHD  | Z114607_021 | 6          |
| FULPROG |             | zg30       |
| TD      |             | 65536      |
| SOLVENT | DMSO        |            |
| NS      |             | 16         |
| DS      |             | 2          |
| SWH     | 11904.762   | Hz         |
| FIDRES  | 0.363304    | Hz         |
| DW      | 2.7525600   | sec        |
| RG      |             | 101        |
| AQ      | 42.620      | usec       |
| DE      | 8.79        | usec       |
| TE      | 299.7       | K          |
| D1      | 1.0000000   | sec        |
| SD1     |             | 1          |
| TOF0    | 600.1337058 | MHz        |
| MUCL1   |             | 1H         |
| PO      |             | 3.33 usec  |
| PF1     |             | 10.00 usec |
| SI      |             | 65536      |
| PC      | 600.1300032 | MHz        |
| WDW     |             | EM         |
| SSB     |             | 0          |
| LB      |             | 0.30 Hz    |
| PC      |             | 1.00       |

Figure 7-3 The  $^{13}\text{C}$  NMR (100 MHz, DMSO- $\text{d}_6$ ) spectrum of compound 6.

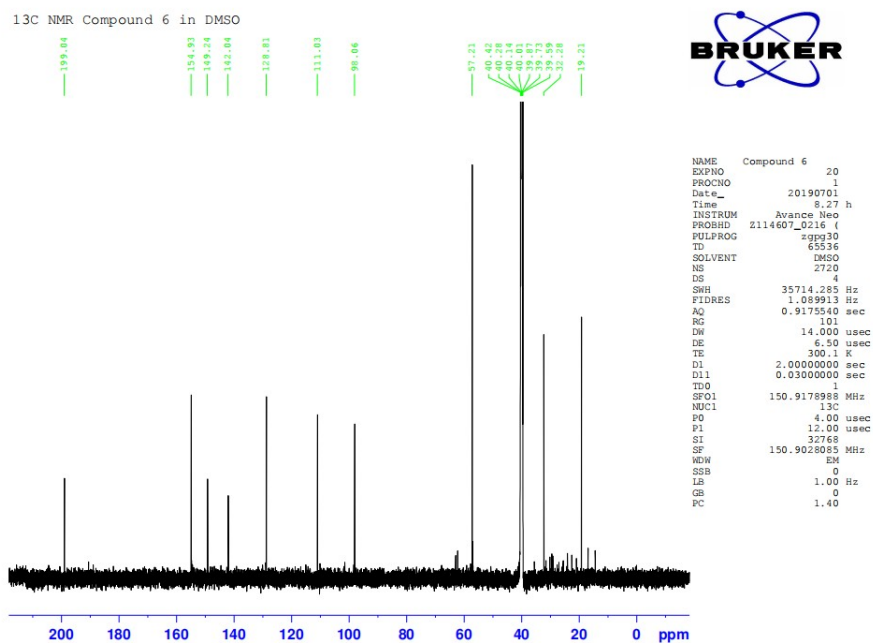

Figure S 8-1 The  $^1\text{H}$  NMR (400 MHz, DMSO- $\text{d}_6$ ) spectrum of compound 7.

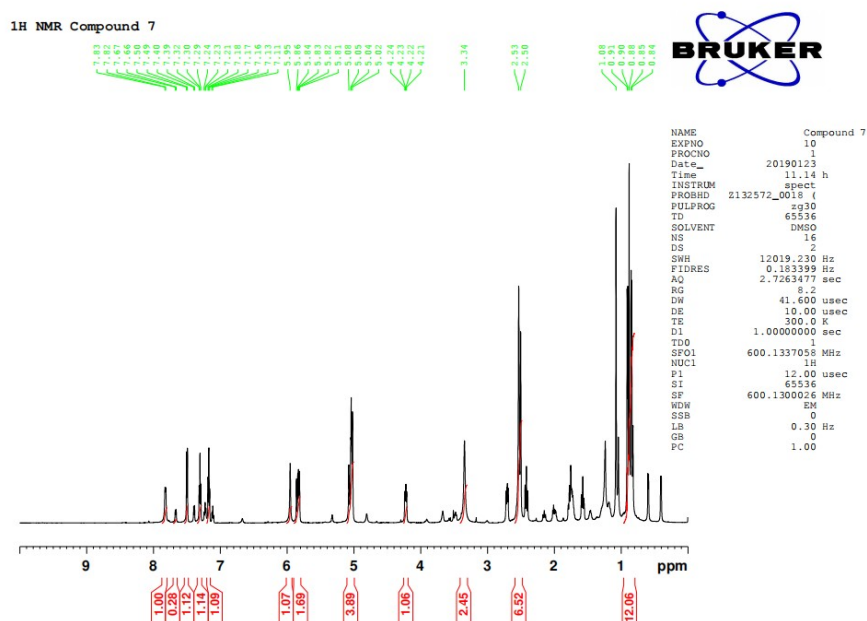

Figure S 8-2 The  $^{13}\text{C}$  NMR (100 MHz, DMSO- $d_6$ ) spectrum of compound 7.

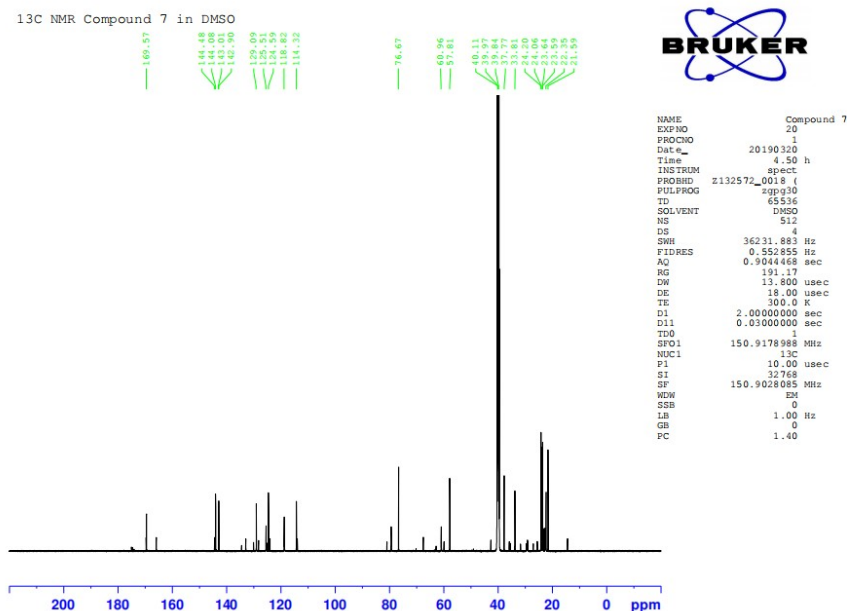

Figure S 9-1 The  $^1\text{H}$  NMR (400 MHz, DMSO- $d_6$ ) spectrum of compound 8.

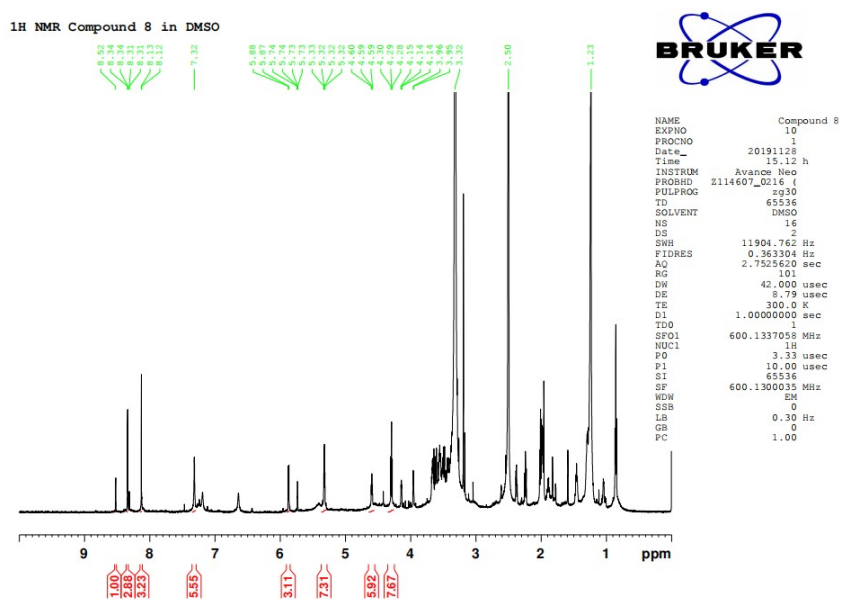

Figure S 9-2 The  $^{13}\text{C}$  NMR (100 MHz, DMSO- $d_6$ ) spectrum of compound 8.

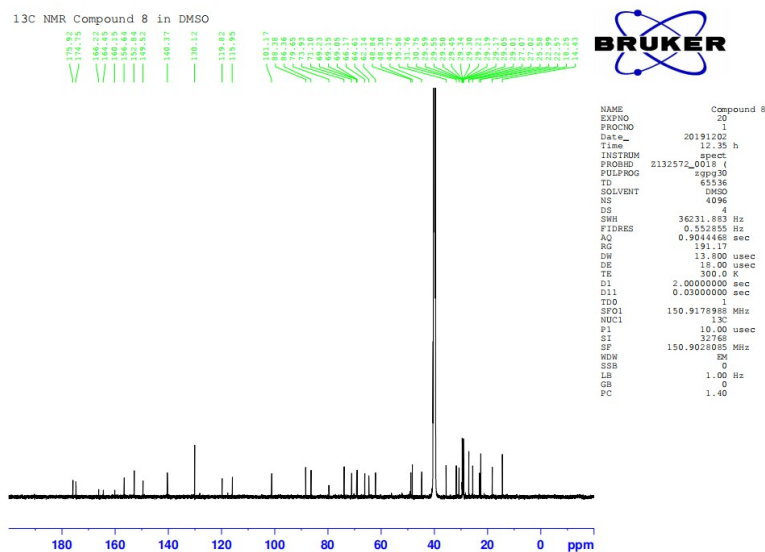

Figure S 10-1 The  $^1\text{H}$  NMR (400 MHz, DMSO- $d_6$ ) spectrum of compound 9.

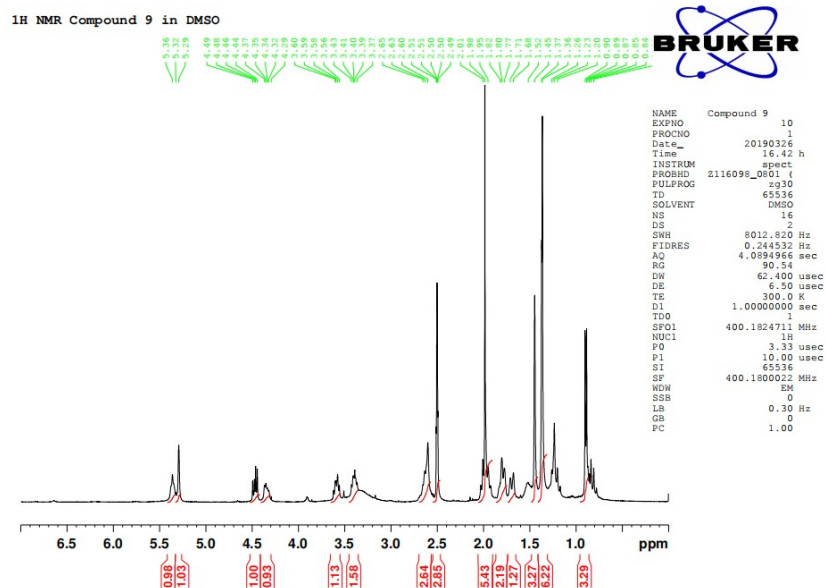

compound 9.

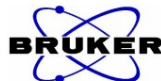

Figure S 11-1 (+)-HRESIMS of Compound 10.

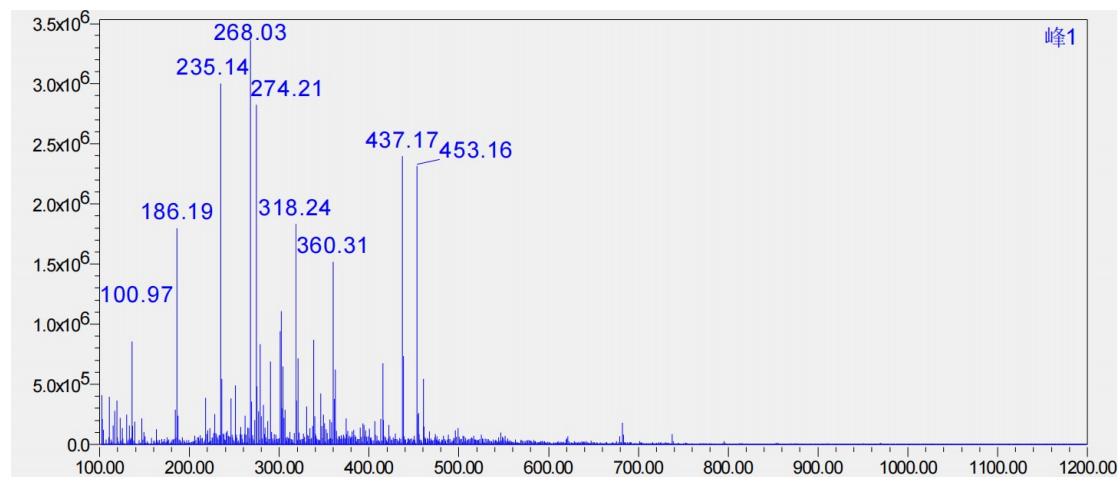

Figure S11-2 The  $^1\text{H}$  NMR (400 MHz,  $\text{DMSO-d}_6$ ) spectrum of compound 10.

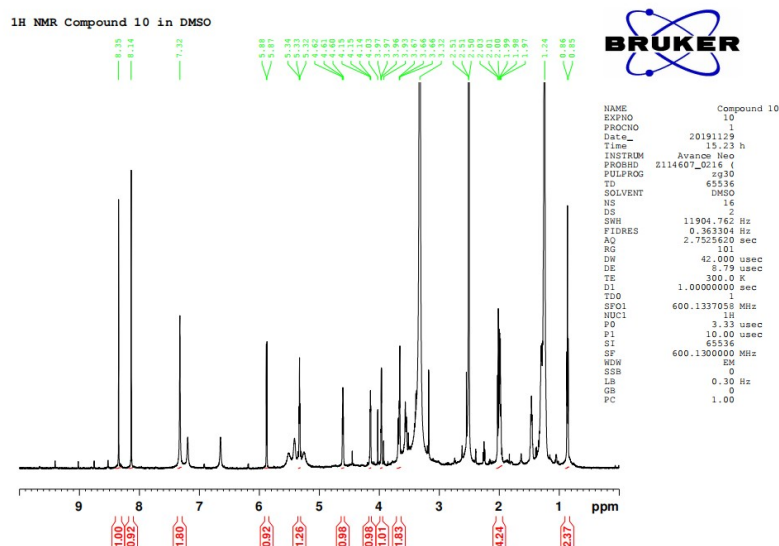

Figure S 12. The Hypothesis of biosynthetic pathway of compounds 1-6

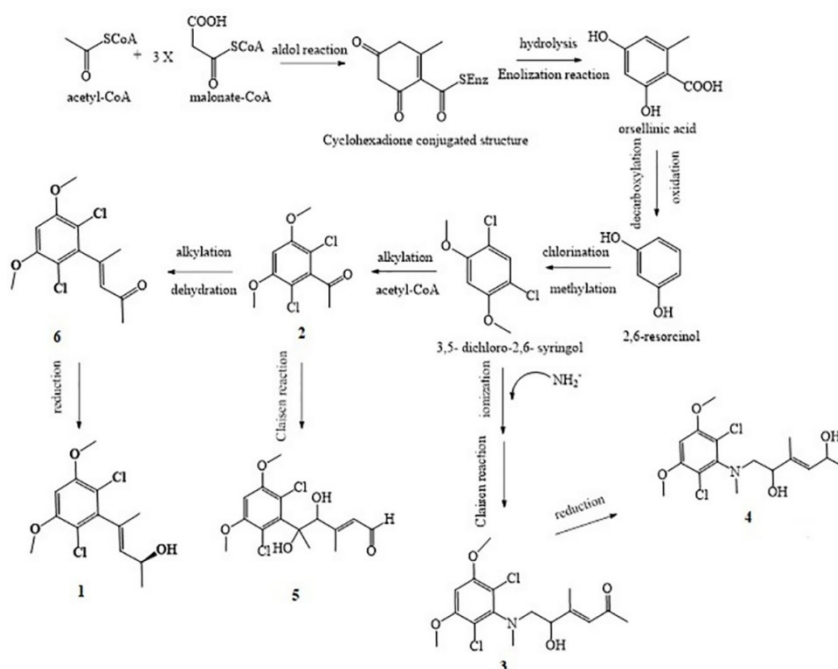

Supplement: s1 [file s1 › fermentation-2348884-supplementary.pdf]
